# Supplementary material for: Feasibility of extended ultrasound examination of the fetal brain between 24 and 37 weeks’ gestation in low-risk pregnancies
Source: publisher site journal article supplement (doi:10.1515/jpm-2022-0605), 2023-04-17
Supplement: Supplementary file 1 [file j_jpm-2022-0605_suppl_001.docx]

Supplementary Table 1 Posterior complex: detection of structures, percentage of agreement, and kappa index.

| **Posterior**  **Complex** | **Percentage of**  **detection**  **examiner A**  **24+0 to 36+6** | **(detected/**  **total)** |  | **Percentage of**  **detection**  **examiner B**  **24+0 to 36+6** | **(detected/**  **total)** |  | **Percentage of**  **Agreement**  **24+0 to 36+6** | **(95% CI)** |  | **Kappa** | **(95% CI)** |
| --- | --- | --- | --- | --- | --- | --- | --- | --- | --- | --- | --- |
| IHF | 98.6 | (361/366) |  | 100 | (366/366) |  | 98.6 | (96.7-99.5) |  | 0 | (0-0) |
| Callosal sulcus | 95.4 | (349/366) |  | 98.6 | (361/366) |  | 95.6 | (92.9-97.3) |  | 0.25 | (0.17-0.34) |
| CC | 96.2 | (352/366) |  | 98.6 | (361/366) |  | 96.4 | (93.9-97.9) |  | 0.3 | (0.21-0.39) |
| PO fissure | 98.1 | (359/366) |  | 99.5 | (364/366) |  | 98.6 | (96.7-99.5) |  | 0.44 | (0.35-0,52) |
| Oblique disposition of proximal LV and/or choroid plexus | 83.3 | (305/366) |  | 94.3 | (345/366) |  | 85.7 | (81.8-89) |  | 0.3 | (0.22-0.39) |
| Oblique disposition of distal LV and/or choroid plexus | 98.1 | (359/366) |  | 98.1 | (359/366) |  | 96.7 | (94.3-98.1) |  | 0.12 | (0.02-0.22) |

IFH, interhemispheric fissure; CC, corpus callosum; PO, parietooccipital; LV, lateral ventricle.

Supplementary Table 2 Transventricular plane: detection of structures, percentage of agreement, and kappa index.

| **Transventricular**  **Plane** | **Percentage of**  **detection**  **examiner A**  **24+0 to 36+6** | **(detected/**  **total)** |  | **Percentage of**  **detection**  **examiner B**  **24+0 to 36+6** | **(detected/**  **total)** |  | **Percentage of**  **Agreement**  **24+0 to 36+6** | **(95% CI)** |  | **Kappa** | **(95% CI)** |
| --- | --- | --- | --- | --- | --- | --- | --- | --- | --- | --- | --- |
| Posterior horn of distal LV | 99.2 | (363/366) |  | 97.0 | (355/366) |  | 96.7 | (94.3-98.1) |  | 0.13 | (0.04-0.21) |
| Atrium of distal LV | 99.5 | (364/366) |  | 98.9 | (362/366) |  | 99.4 | (97.9-99.9) |  | 0.66 | (0.56-0.76) |
| Distal choroid plexus | 100 | (366/366) |  | 99.2 | (363/366) |  | 99.1 | (97.5-99.8) |  | 0 | (0-0) |
| Distal posterior periventricular white matter | 94.5 | (346/366) |  | 84.4 | (309/366) |  | 88 | (85.1-91.6) |  | 0.42 | (0.33-0.51) |
| Cortical surface of distal  occipital lobe | 99.7 | (365/366) |  | 98.9 | (362/366) |  | 99.1 | (97.5-99.8) |  | 0.4 | (0.31-0.48) |
| Cortical surface of distal  temporal lobe | 97.8 | (358/366) |  | 97 | (355/366) |  | 98.1 | (96-99.1) |  | 0.62 | (0.52-0.72) |
| Posterior horn of proximal LV | 37.4 | (137/366) |  | 54.6 | (200/366) |  | 76.2 | (71.6-80.3) |  | 0.53 | (0.43-0.63) |
| Atrium of proximal LV | 36.3 | (133/366) |  | 53 | (194/366) |  | 75.6 | (71-79.8) |  | 0.52 | (0.42-0.61) |
| Proximal choroid plexus | 43.4 | (159/366) |  | 56.3 | (206/366) |  | 83.3 | (79.1-86.8) |  | 0.67 | (0.57-0.77) |
| Proximal  posterior periventricular white matter | 28.4 | (104/366) |  | 40.7 | (149/366) |  | 84.9 | (80.9-88.2) |  | 0.67 | (0.57-0.77) |
| Cortical surface of proximal  occipital lobe | 49.2 | (180/366) |  | 59.8 | (219/366) |  | 89.3 | (85.7-92.1) |  | 0.78 | (0.68-0.88) |
| Cortical surface of proximal  temporal lobe | 15.6 | (57/366) |  | 27 | (99/366) |  | 86.9 | (83-90) |  | 0.61 | (0.52-0.71) |

LV, lateral ventricle.

Supplementary Table 7 Proximal hemisphere plane (posterior access): detection of structures, percentage of agreement, and kappa index

| **Proximal Cerebral Hemisphere (posterior access)** | **Percentage of**  **detection**  **examiner A**  **24+0 to 36+6** | **(detected/**  **total)** |  | **Percentage of**  **detection**  **examiner B**  **24+0 to 36+6** | **(detected/**  **total)** |  | **Percentage of**  **Agreement**  **24+0 to 36+6** | **(95% CI)** |  | **Kappa** | **(95% CI)** |
| --- | --- | --- | --- | --- | --- | --- | --- | --- | --- | --- | --- |
| Posterior horn of LV | 98.9 | (362/366) |  | 94 | (344/366) |  | 93.9 | (91-96) |  | 0.13 | (0.06-0.21) |
| Proximal atrium | 98.4 | (360/366) |  | 98.9 | (362/366) |  | 98.9 | (97.1-99.6) |  | 0.59 | (0.49-0.69) |
| Proximal choroid plexus | 98.6 | (361/366) |  | 99.2 | (363/366) |  | 98.9 | (97.1-99.6) |  | 0.49 | (0.39-0.59) |
| Periventricular white matter | 97.3 | (356/366) |  | 98.4 | (360/366) |  | 97.8 | (95.6-98.9) |  | 0.49 | (0.39-0,58) |
| Cortical surface of occipital lobe | 98.4 | (360/366) |  | 97.3 | (356/366) |  | 97.8 | (95.6-98.9) |  | 0.49 | (0.39-0.58) |
| Cortical surface of temporal lobe | 96.2 | (352/366) |  | 95.9 | (351/366) |  | 95.9 | (93.3-97.5) |  | 0.46 | (0.35-0.56) |

LV, lateral ventricle.

Supplementary Table 4 Proximal hemisphere plane (anterior access): detection of structures, percentage of agreement, and kappa index.

| **Proximal Cerebral Hemisphere (anterior access)** | **Percentage of**  **detection**  **examiner A**  **24+0 to 36+6** | **(detected/**  **total)** |  | **Percentage of**  **detection**  **examiner B**  **24+0 to 36+6** | **(detected/**  **total)** |  | **Percentage of**  **Agreement**  **24+0 to 36+6** | **(95% CI)** |  | **Kappa** | **(95% CI)** |
| --- | --- | --- | --- | --- | --- | --- | --- | --- | --- | --- | --- |
| Anterior horn of LV | 97.3 | (356/366) |  | 97.8 | (358/366) |  | 98.9 | (97.1-99.6) |  | 0.77 | (0.67-0.87) |
| Periventricular white matter | 97.3 | (356/366) |  | 97.8 | (358/366) |  | 97.8 | (95.6-98.9) |  | 0.54 | (0.44-0,64) |
| Cortical surface of frontal lobe | 83.1 | (304/366) |  | 69.4 | (254/366) |  | 82.5 | (78.2-86.0) |  | 0.53 | (0.43-0.62) |
| Sylvian fissure | 97.8 | (358/366) |  | 98.1 | (359/366) |  | 98.1 | (96.0-99.1) |  | 0.52 | (0.42-0.62) |

LV, lateral ventricle.
